# Supplementary material
Source: ML conference proceedings conference paper supplement (https://openreview.net/forum?id=VUYCyH8fCw)

## Inputs

Drug

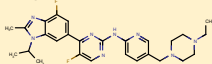

SMILES

```
CCN1CCN(CC2=CC=C(NC3=NC=C(F)C(=N3)C3=CC(F)=C4N=C(C)N(C(C)C)C4=C3)N=C2)CC1
```

## Model

Bag-of-n-grams  
Model

Bag Of  
Words

Select TopK and move  
others to UNK (unknown)

Create  
Sequence

MLP

## Outputs

Output Probabilities

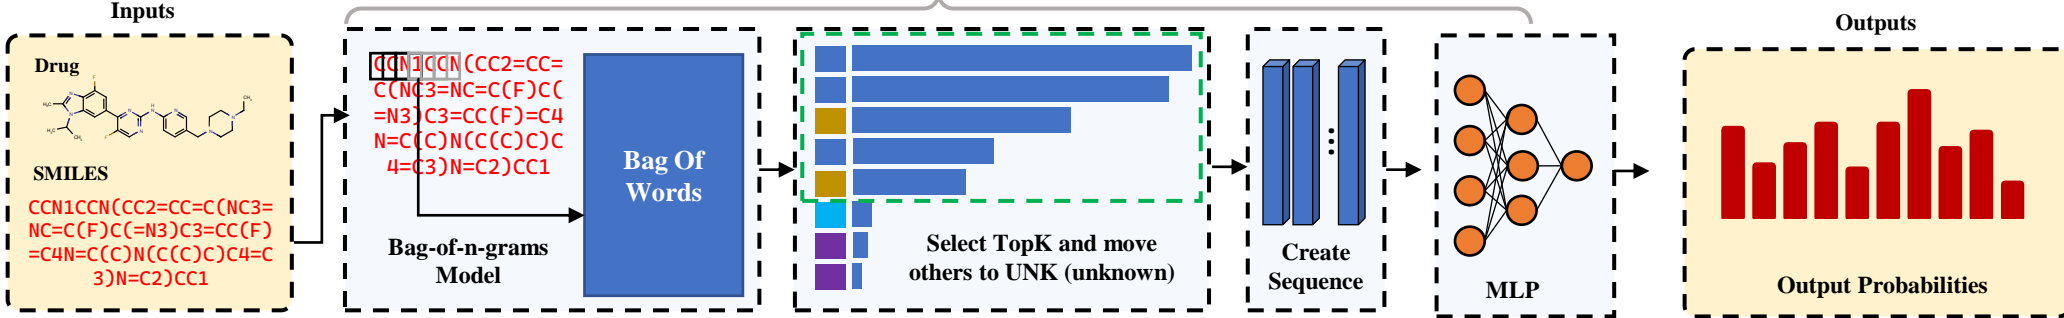

Supplement: supplementary_material [file attachment]
